# Supplementary material
Source: Springer Nature journal article supplement (https://www.springermedizin.de/resource/supplementary/12974_2011_379_MOESM6_ESM.pdf/9601552)

**A**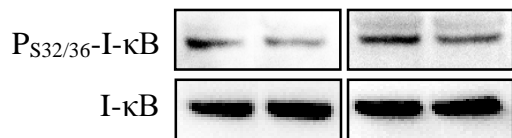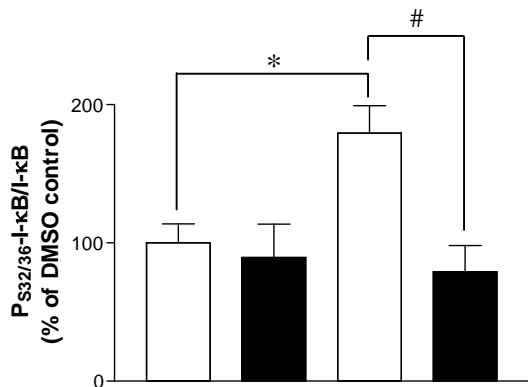

Aβ42

-

-

+

+

C16

-

+

-

+

**B**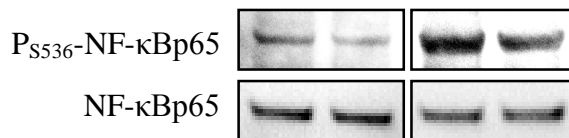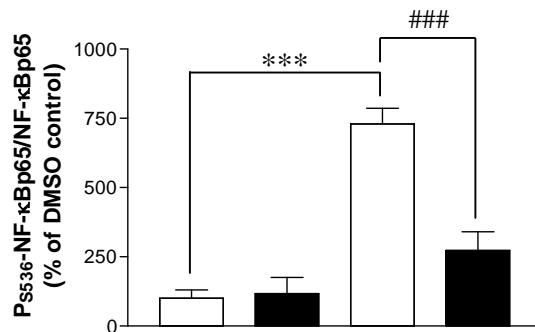

Aβ42

-

-

+

+

C16

-

+

-

+

Supplement: MOESM6 [file 9601552]
